# Supplementary material
Source: publisher figshare collection journal article supplement (https://frontiersin.figshare.com/ndownloader/files/14963570)

**Supplemental file 2.** Effect of pod genotype on oviposition of *B. pisorum* females previously feed with pollen of cv. Messire. (A) Pea cv. Messire pod with abundant eggs laid; (B) *Faba bean* cv. Brocal pod without eggs laid; (C) and (D) details of (B) showing eggs lied elsewhere (on top of the parafilm and ppendorf tube) but not on pod.

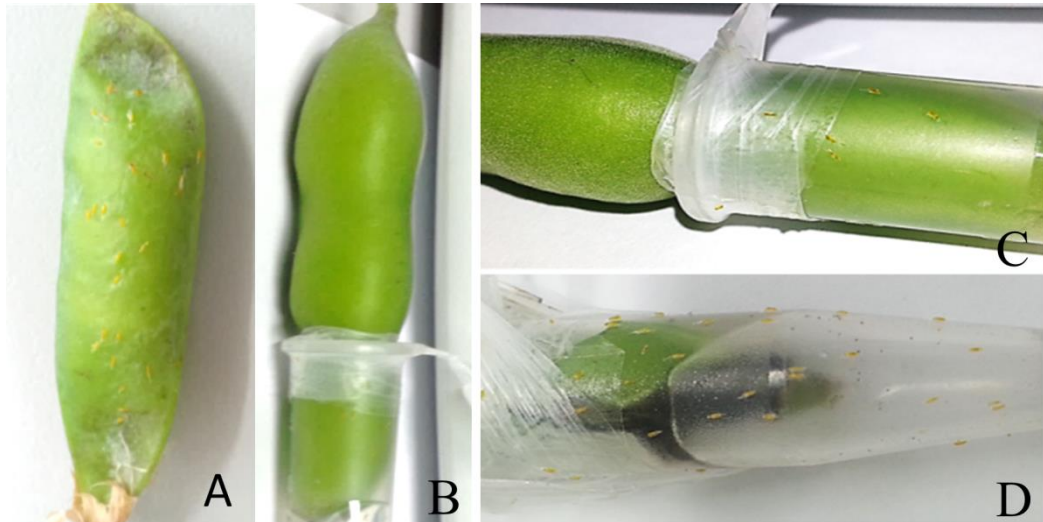

Supplement: Supplementary file [file 14963570]
